# Supplementary material for: Commensal Akkermansia muciniphila Exacerbates Gut Inflammation in Salmonella Typhimurium-Infected Gnotobiotic Mice
Source: PubMed Central journal article supplement (PMC3769299; doi:10.1371/journal.pone.0074963), 2013-09-10
Supplement: pone.0074963.s006.pdf [file pone.0074963.s006.pdf]

**Table S1. *S. Typhimurium* becomes the dominant species in colon of SIHUMI mice previously associated with *A. muciniphila*.**

Data are expressed as mean  $\pm$  standard error. Different superscripts indicate statistically significant differences ( $P \leq 0.05$ ). n = 10 mice per group. DW: dry weight.

| Colon                     | SIHUMI<br>$\log_{10} (\text{g}^{-1} \text{DW})$ | SIHUMI-S<br>$\log_{10} (\text{g}^{-1} \text{DW})$ | SIHUMI-A<br>$\log_{10} (\text{g}^{-1} \text{DW})$ | SIHUMI-AS<br>$\log_{10} (\text{g}^{-1} \text{DW})$ |
|---------------------------|-------------------------------------------------|---------------------------------------------------|---------------------------------------------------|----------------------------------------------------|
| <i>A caccae</i>           | 8.6 $\pm$ 0.6 <sup>b</sup>                      | 9.2 $\pm$ 0.3 <sup>b</sup>                        | 8.9 $\pm$ 0.3 <sup>b</sup>                        | 6.9 $\pm$ 1.2 <sup>a</sup>                         |
| <i>B longum</i>           | 9.0 $\pm$ 0.2 <sup>b</sup>                      | 9.1 $\pm$ 0.5 <sup>b</sup>                        | 9.4 $\pm$ 0.2 <sup>b</sup>                        | 7.4 $\pm$ 1.4 <sup>a</sup>                         |
| <i>B producta</i>         | 10.2 $\pm$ 0.5 <sup>b</sup>                     | 10.5 $\pm$ 0.2 <sup>b</sup>                       | 10.6 $\pm$ 0.2 <sup>b</sup>                       | 7.7 $\pm$ 1.3 <sup>a</sup>                         |
| <i>B thetaiotaomicron</i> | 10.7 $\pm$ 0.5 <sup>b</sup>                     | 11.0 $\pm$ 0.3 <sup>b</sup>                       | 11.5 $\pm$ 0.4 <sup>b</sup>                       | 9.2 $\pm$ 0.9 <sup>a</sup>                         |
| <i>C ramosum</i>          | 9.0 $\pm$ 0.3 <sup>b</sup>                      | 9.7 $\pm$ 0.3 <sup>c</sup>                        | 8.9 $\pm$ 0.5 <sup>b</sup>                        | 8.0 $\pm$ 1.1 <sup>a</sup>                         |
| <i>E coli</i>             | 9.3 $\pm$ 0.4 <sup>b</sup>                      | 8.7 $\pm$ 0.3 <sup>b</sup>                        | 9.2 $\pm$ 0.6 <sup>b</sup>                        | 6.1 $\pm$ 0.8 <sup>a</sup>                         |
| <i>C butyricum</i>        | 9.5 $\pm$ 0.3 <sup>b</sup>                      | 9.3 $\pm$ 0.4 <sup>b</sup>                        | 9.5 $\pm$ 0.3 <sup>b</sup>                        | 8.2 $\pm$ 1.4 <sup>a</sup>                         |
| <i>A muciniphila</i>      | n.d.                                            | n.d.                                              | 10.4 $\pm$ 0.2 <sup>b</sup>                       | 8.1 $\pm$ 0.6 <sup>a</sup>                         |
| <i>Salmonella</i>         | n.d.                                            | 9.7 $\pm$ 0.2 <sup>a</sup>                        | n.d.                                              | 10.0 $\pm$ 0.4 <sup>a</sup>                        |
| <b>Total bacteria</b>     | 10.6 $\pm$ 0.7 <sup>b</sup>                     | 10.7 $\pm$ 0.6 <sup>b</sup>                       | 11.1 $\pm$ 0.8 <sup>b</sup>                       | 9.3 $\pm$ 0.7 <sup>a</sup>                         |
